# Supplementary material for: Gene expression profiles in asbestos-exposed epithelial and mesothelial lung cell lines
Source: Springer Nature journal article supplement (doi:10.1186/1471-2164-8-62), 2007-03-01
Supplement: 12864_2006_775_MOESM7_ESM.pdf [file 12864_2006_775_MOESM7_ESM.pdf]

A549 cell line, model profile of cluster 5

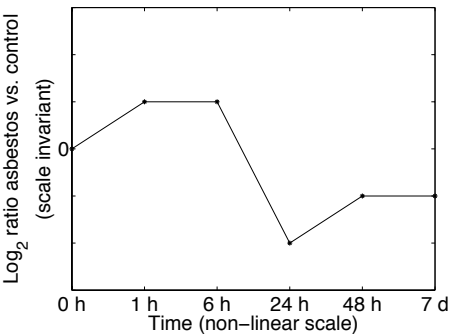

A

A549 cell line, model profile of cluster 1

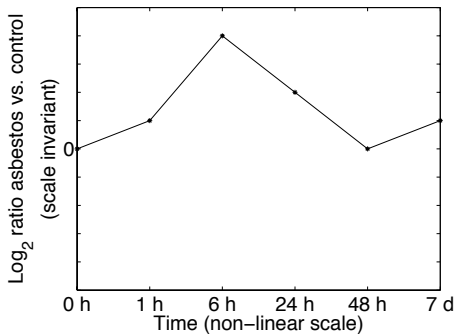

B

A549 cell line, model profile of cluster 9

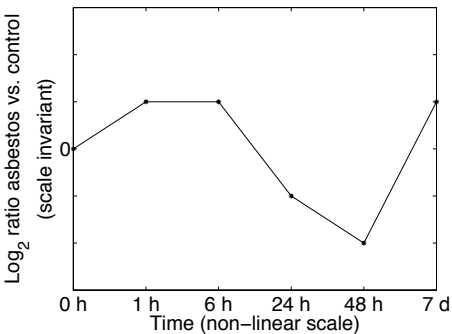

C

BEAS-2B cell line, model profile of cluster 8

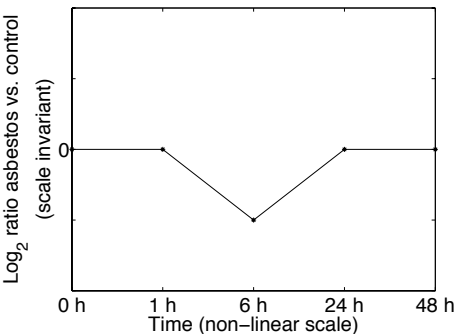

D

BEAS-2B cell line, model profile of cluster 5

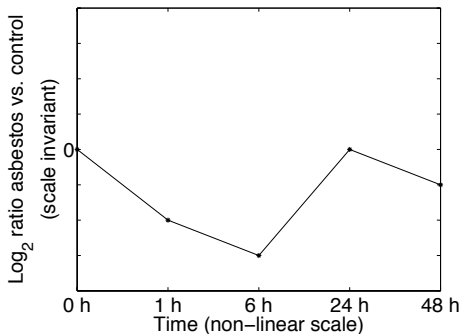

E

BEAS-2B cell line, model profile of cluster 1

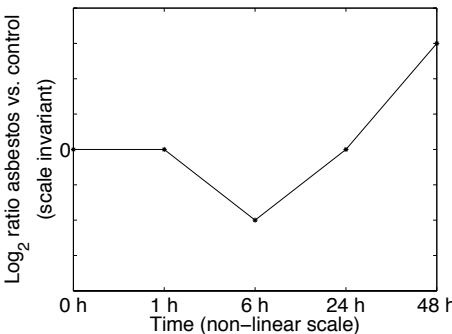

F

Met5A cell line, model profile of cluster 3

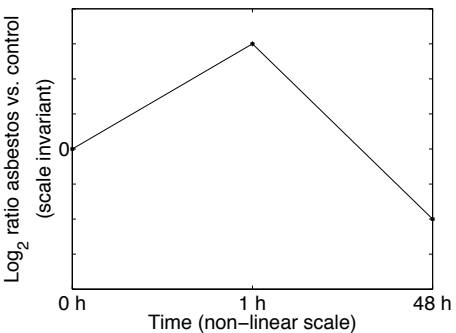

G

Met5A cell line, model profile of cluster 2

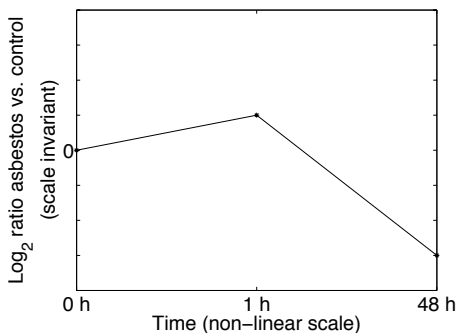

H

Met5A cell line, model profile of cluster 1

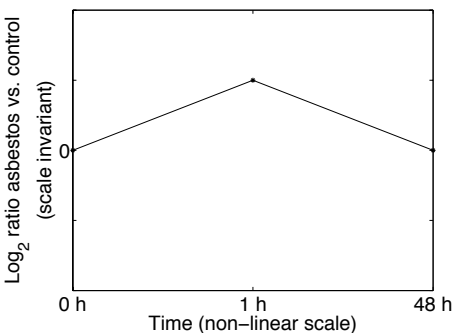

I
