# Supplementary figures and images for: Gene expression profiles in asbestos-exposed epithelial and mesothelial lung cell lines
Source: Springer Nature journal article supplement (doi:10.1186/1471-2164-8-62), 2007-03-01

CCA (21 chromosomal regions)

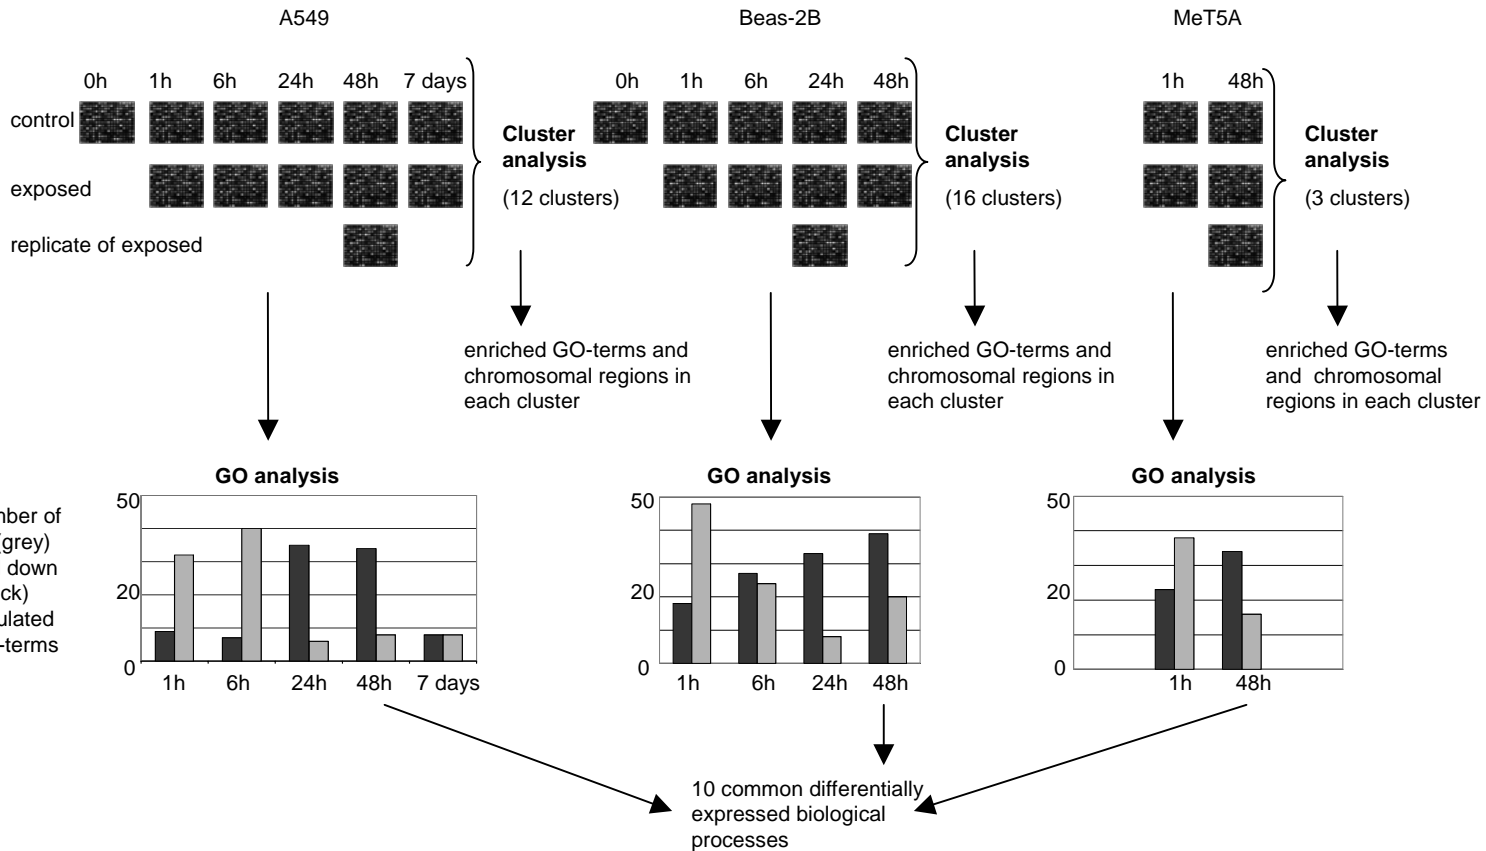

Supplement: 12864_2006_775_MOESM6_ESM.pdf [file 12864_2006_775_MOESM6_ESM.pdf]

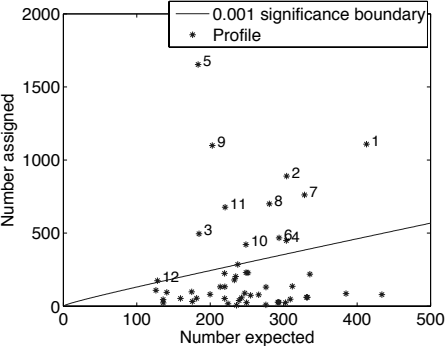

A

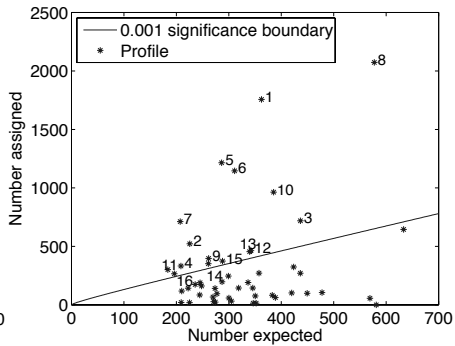

B

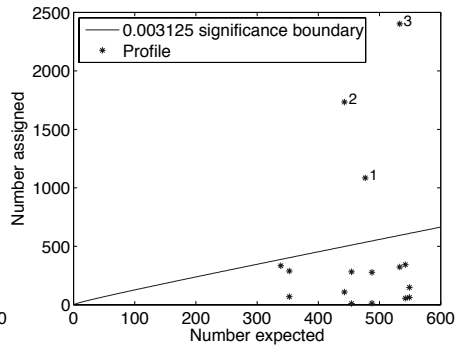

C

Supplement: 12864_2006_775_MOESM8_ESM.pdf [file 12864_2006_775_MOESM8_ESM.pdf]
